# Supplementary material for: A versatile strategy to synthesize N-methyl-anthranilic acid-labelled glycoprobes for fluorescence-based screening assays
Source: Royal Society of Chemistry journal article supplement (doi:10.1039/d0cc03882b), 2020-01-01
Supplement: d0cc03882b1.pdf [file d0cc03882b1.pdf]

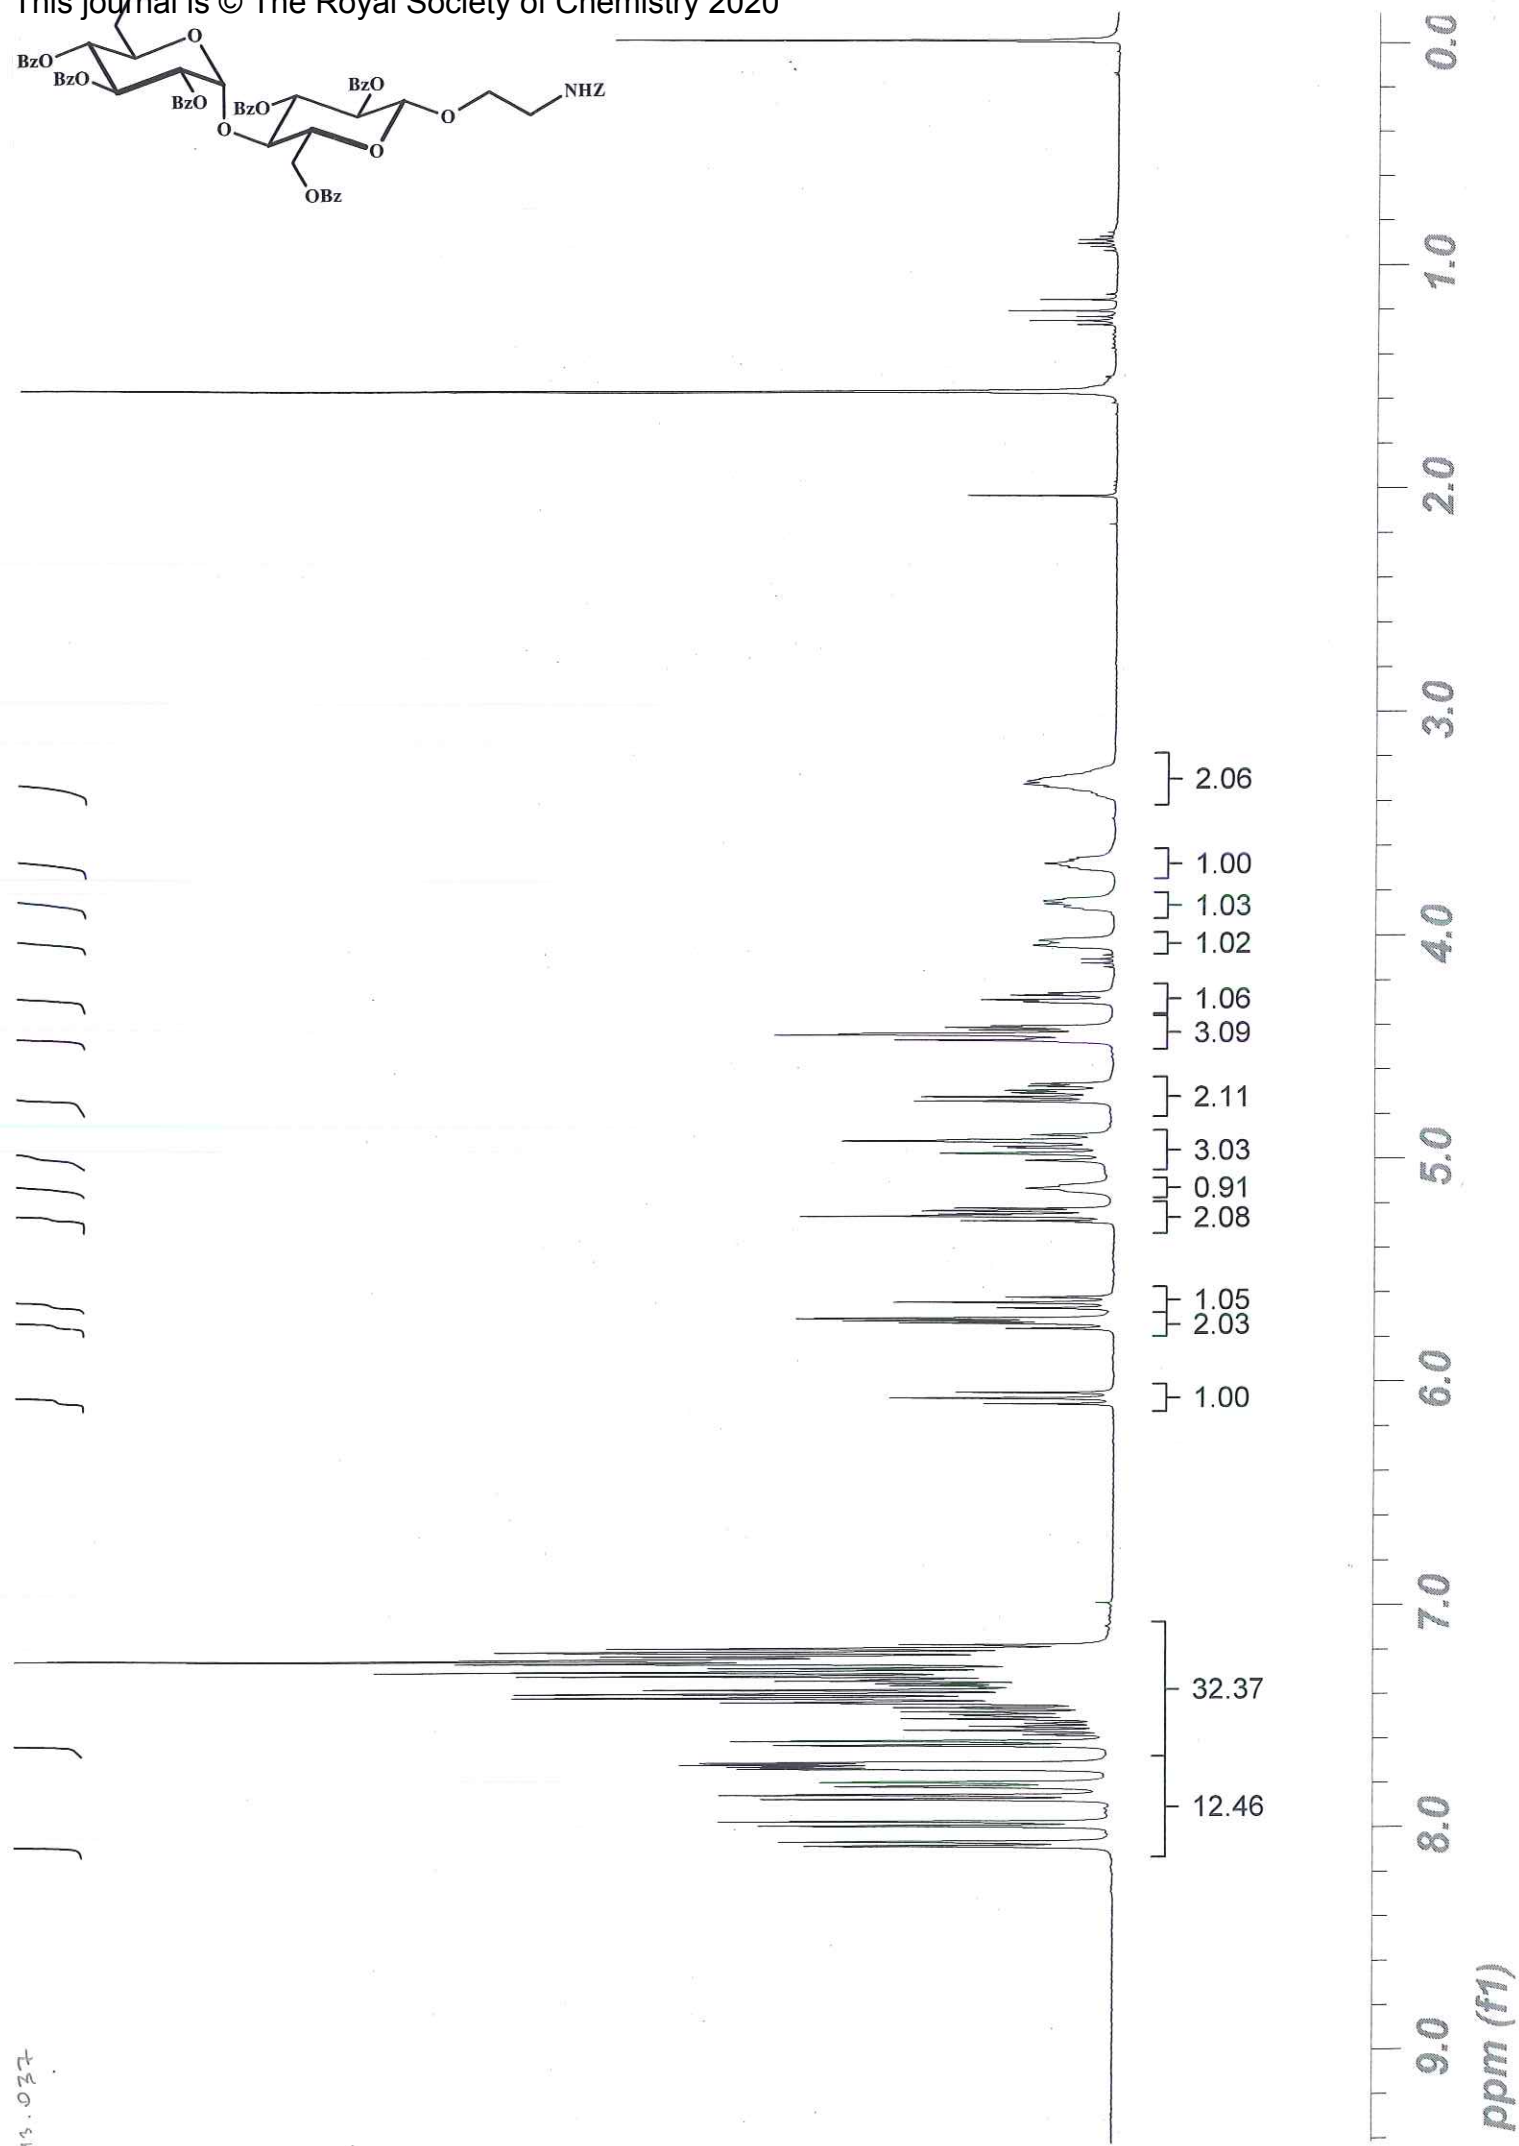

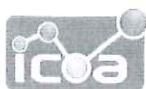

Analysis Info

Sample Name **JCJ.13.037**  
Analysis Name X005057CYC.d  
Method Positif.m

Acquisition Date 12/09/2012 15:59:11

Laboratory  
Instrument / Ser# maXis 255552.00  
086

Acquisition Parameter

|             |            |                       |            |                  |           |
|-------------|------------|-----------------------|------------|------------------|-----------|
| Source Type | ESI        | Ion Polarity          | Positive   | Set Nebulizer    | 0.6 Bar   |
| Focus       | Not active | Set Capillary         | 4500 V     | Set Dry Heater   | 200 °C    |
| Scan Begin  | 50 m/z     | Set End Plate Offset  | -500 V     | Set Dry Gas      | 7.0 l/min |
| Scan End    | 3000 m/z   | Set Collision Cell RF | 1000.0 Vpp | Set Divert Valve | Waste     |

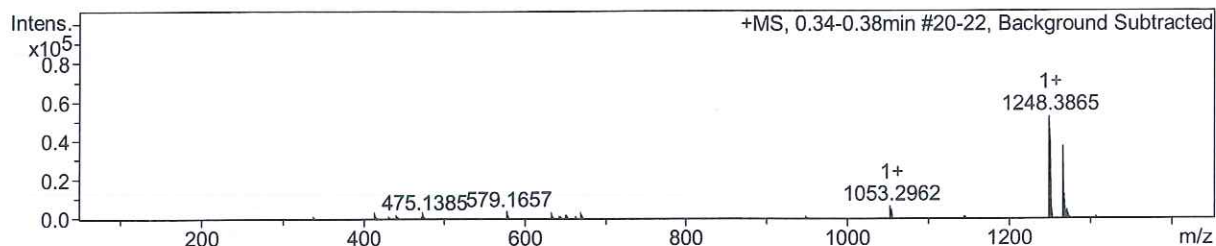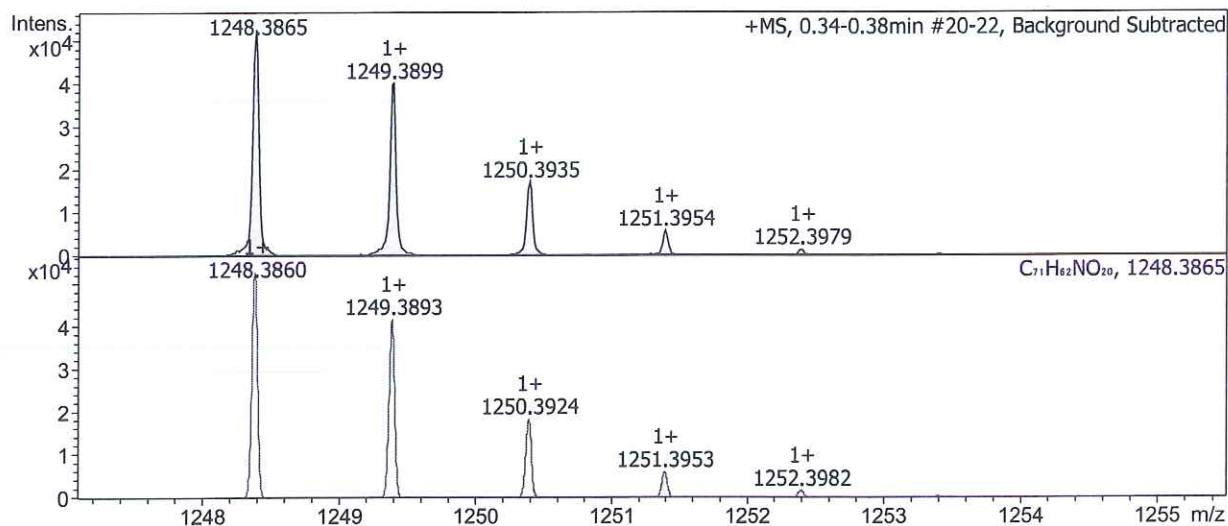

| Meas. m/z   | # | Ion Formula    | m/z         | err [ppm] | mSigma | rdb   | e <sup>-</sup> Conf | N-Rule |
|-------------|---|----------------|-------------|-----------|--------|-------|---------------------|--------|
| 579.165713  | 1 | C34H27O9       | 579.164959  | -1.3      | 24.2   | 21.5  | even                | ok     |
| 1053.296162 | 1 | C61H49O17      | 1053.296427 | 0.3       | 8.2    | 37.5  | even                | ok     |
|             | 2 | C63H170NO7     | 1053.297183 | 1.0       | 15.2   | -20.5 | even                | ok     |
|             | 3 | C74H41N2O6     | 1053.295913 | -0.2      | 68.3   | 55.5  | even                | ok     |
| 1248.386455 | 1 | C71H62NO20     | 1248.385970 | -0.4      | 14.2   | 41.5  | even                | ok     |
|             | 2 | C73H183N2O10   | 1248.386726 | 0.2       | 28.1   | -16.5 | even                | ok     |
|             | 3 | C85H179O3      | 1248.384876 | -1.3      | 89.8   | -3.5  | even                | ok     |
| 1265.412862 | 1 | C71H65N2O20    | 1265.412519 | -0.3      | 11.1   | 40.5  | even                | ok     |
|             | 1 | C73H186N3O10   | 1265.413276 | 0.3       | 24.5   | -17.5 | even                | ok     |
|             | 1 | C85H182NO3     | 1265.411425 | -1.1      | 86.1   | -4.5  | even                | ok     |
| 1270.368237 | 1 | C71H61NNaO20   | 1270.367914 | -0.3      | 31.8   | 41.5  | even                | ok     |
|             | 1 | C73H182N2NaO10 | 1270.368671 | 0.3       | 23.8   | -16.5 | even                | ok     |
|             | 1 | C85H178NaO3    | 1270.366820 | -1.1      | 50.8   | -3.5  | even                | ok     |

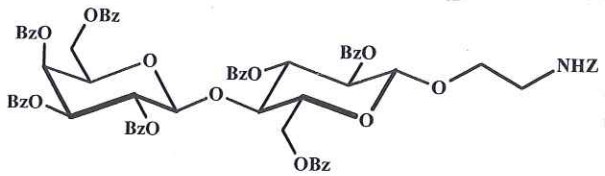

Handwritten annotations on the left side of the spectrum, including vertical lines and curly braces, likely indicating specific peak regions or integration values.

Integration values for the spectrum peaks:

- 1.99
- 1.05
- 2.03
- 1.88
- 0.96
- 0.98
- 1.00
- 1.96
- 2.95
- 0.91
- 1.94
- 2.92

Integration values for the aromatic region peaks:

- 28.86
- 13.77

Chemical shift scale in ppm (f1):

9.0 8.0 7.0 6.0 5.0 4.0 3.0 2.0 1.0 0.0

ppm (f1)

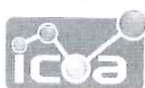

Analysis Info

Sample Name **JCJ.13.038**  
Analysis Name X005058CYC.d  
Method Positif.m

Acquisition Date 12/09/2012 16:01:14

Laboratory  
Instrument / Ser# maXis 255552.00  
086

Acquisition Parameter

|             |            |                       |            |                  |           |
|-------------|------------|-----------------------|------------|------------------|-----------|
| Source Type | ESI        | Ion Polarity          | Positive   | Set Nebulizer    | 0.6 Bar   |
| Focus       | Not active | Set Capillary         | 4500 V     | Set Dry Heater   | 200 °C    |
| Scan Begin  | 50 m/z     | Set End Plate Offset  | -500 V     | Set Dry Gas      | 7.0 l/min |
| Scan End    | 3000 m/z   | Set Collision Cell RF | 1000.0 Vpp | Set Divert Valve | Waste     |

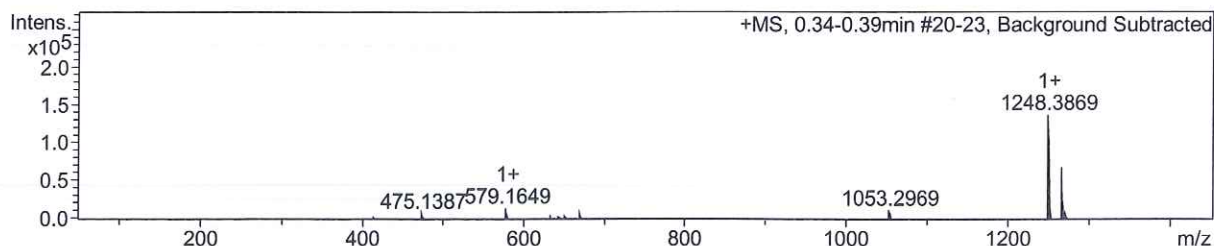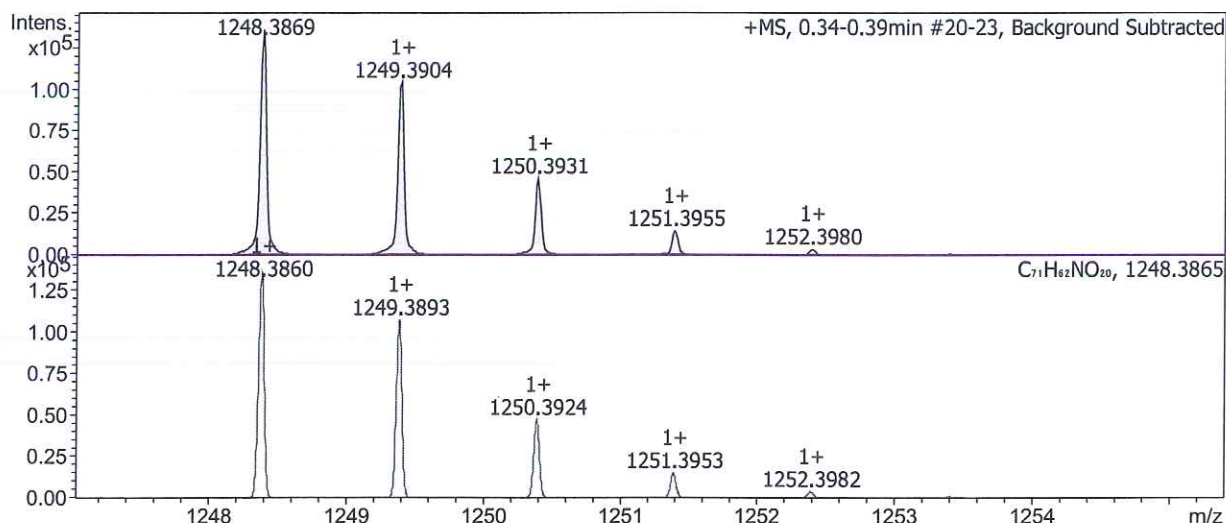

| Meas. m/z   | # | Ion Formula  | m/z         | err [ppm] | mSigma | rdb   | e <sup>-</sup> Conf | N-Rule |
|-------------|---|--------------|-------------|-----------|--------|-------|---------------------|--------|
| 670.227591  | 1 | C37H36NO11   | 670.228287  | 1.0       | 10.1   | 20.5  | even                | ok     |
| 1248.386907 | 1 | C71H62NO20   | 1248.385970 | -0.8      | 8.9    | 41.5  | even                | ok     |
|             | 2 | C73H183N2O10 | 1248.386726 | -0.1      | 23.4   | -16.5 | even                | ok     |
|             | 3 | C85H179O3    | 1248.384876 | -1.6      | 84.5   | -3.5  | even                | ok     |
| 1265.413488 | 1 | C71H65N2O20  | 1265.412519 | -0.8      | 4.7    | 40.5  | even                | ok     |
|             | 1 | C73H186N3O10 | 1265.413276 | -0.2      | 19.0   | -17.5 | even                | ok     |
|             | 1 | C85H182NO3   | 1265.411425 | -1.6      | 79.5   | -4.5  | even                | ok     |

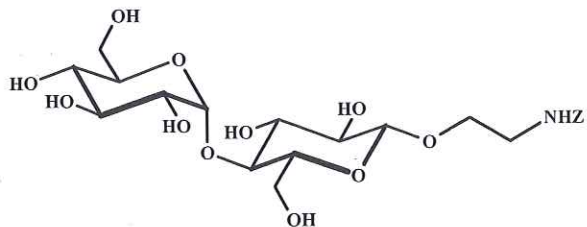

12.028 (MeOH)

1

12.028 (MeOH)

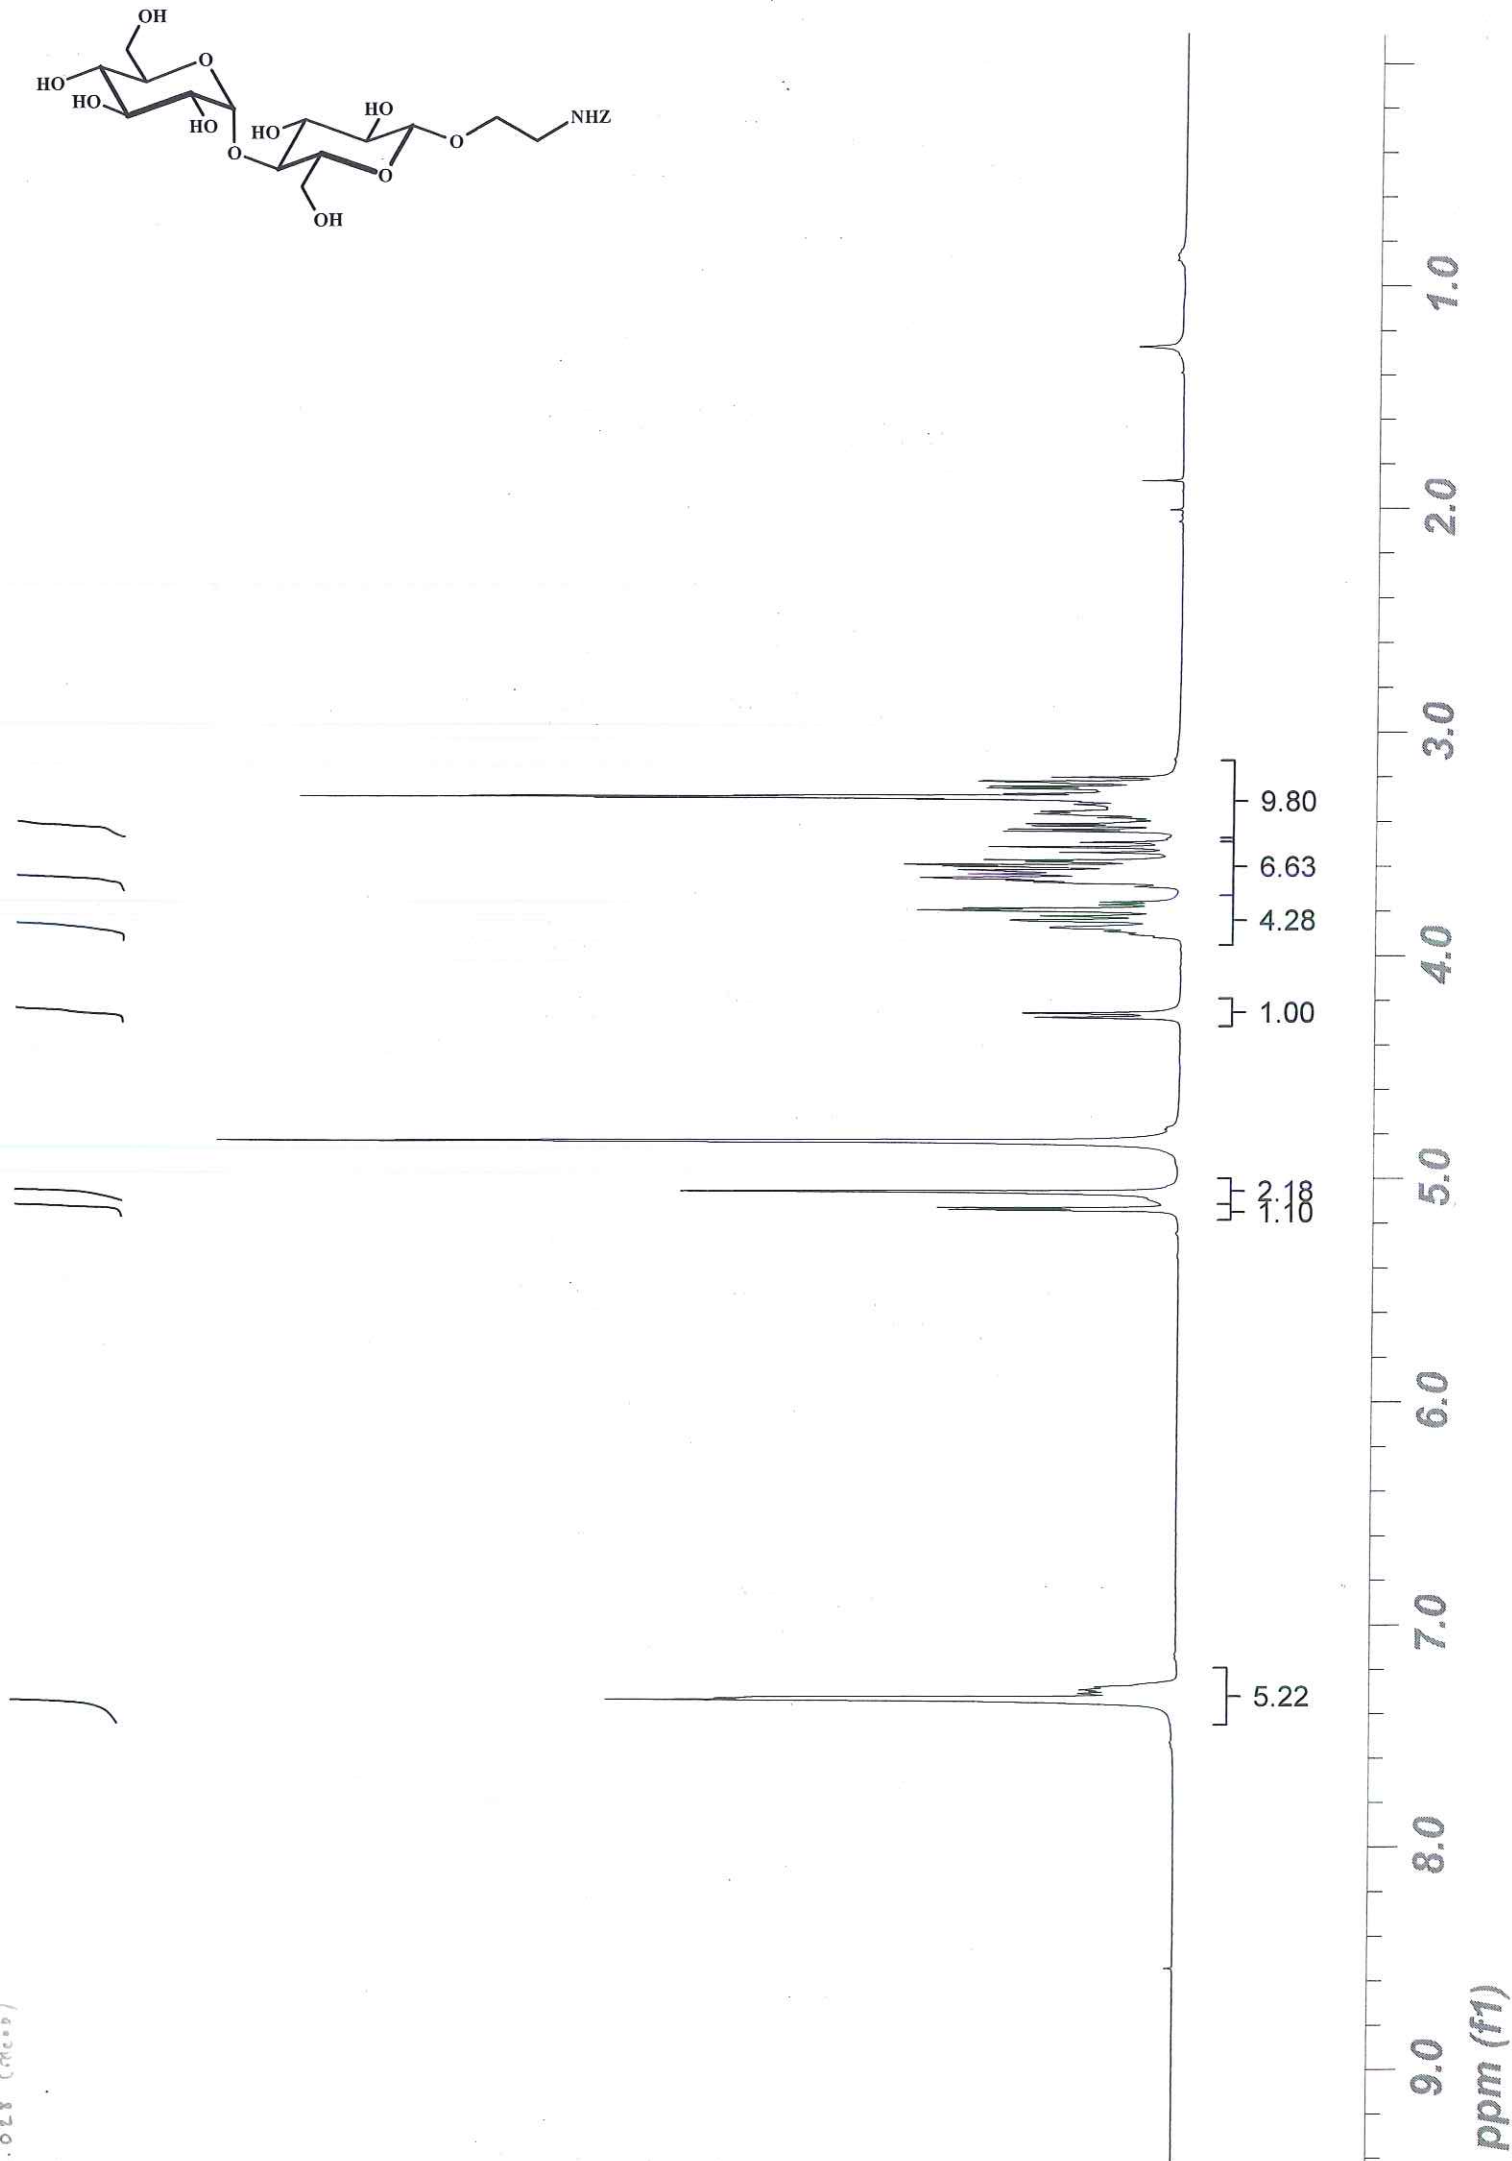



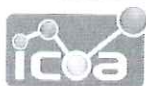

Analysis Info

Sample Name **JCJ13.028**  
Analysis Name X004321CYC.d  
Method Positif.m

Acquisition Date 20/06/2012 13:24:05

Laboratory  
Instrument / Ser# maXis 255552.00  
086

Acquisition Parameter

|             |            |                       |            |                  |           |
|-------------|------------|-----------------------|------------|------------------|-----------|
| Source Type | ESI        | Ion Polarity          | Positive   | Set Nebulizer    | 0.6 Bar   |
| Focus       | Not active | Set Capillary         | 4500 V     | Set Dry Heater   | 200 °C    |
| Scan Begin  | 50 m/z     | Set End Plate Offset  | -500 V     | Set Dry Gas      | 7.0 l/min |
| Scan End    | 3000 m/z   | Set Collision Cell RF | 1000.0 Vpp | Set Divert Valve | Waste     |

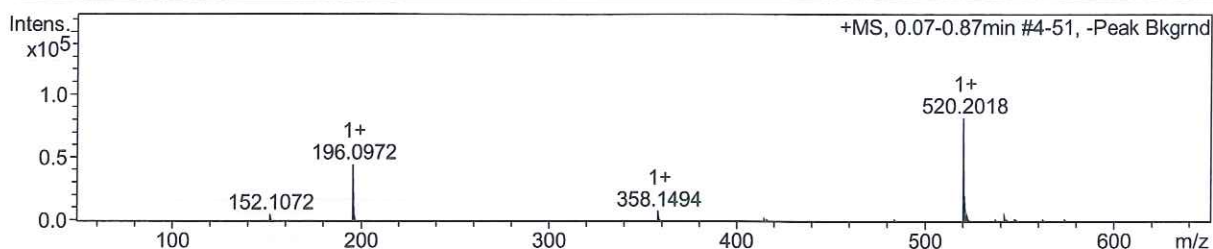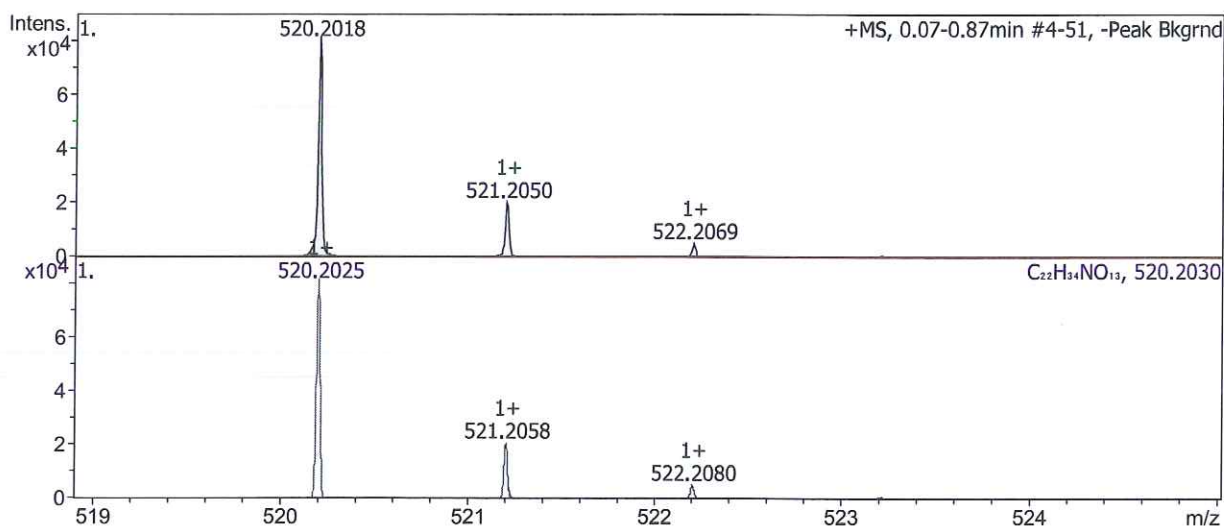

| Meas. m/z  | # | Ion Formula                                        | m/z        | err [ppm] | mSigma | rdB | e <sup>-</sup> Conf | N-Rule |
|------------|---|----------------------------------------------------|------------|-----------|--------|-----|---------------------|--------|
| 196.097168 | 1 | C <sub>10</sub> H <sub>14</sub> NO <sub>3</sub>    | 196.096820 | -1.8      | 0.5    | 4.5 | even                | ok     |
| 358.149369 | 1 | C <sub>16</sub> H <sub>24</sub> NO <sub>8</sub>    | 358.149643 | 0.8       | 2.2    | 5.5 | even                | ok     |
| 520.201820 | 1 | C <sub>22</sub> H <sub>34</sub> NO <sub>13</sub>   | 520.202467 | 1.2       | 3.1    | 6.5 | even                | ok     |
| 542.183153 | 1 | C <sub>22</sub> H <sub>33</sub> NNaO <sub>13</sub> | 542.184411 | 2.3       | 29.0   | 6.5 | even                | ok     |

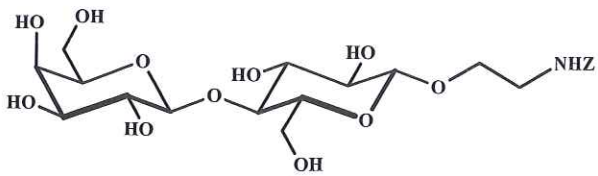

Handwritten annotations on the left side of the spectrum, including several vertical lines and curly braces, likely indicating specific peak regions or integration values.

Handwritten annotation on the left side of the spectrum, consisting of a single vertical line.

Handwritten annotation on the left side of the spectrum, consisting of a single vertical line.

13.029 (1000)

4.34  
1.99  
5.17  
2.11  
5.09  
2.00  
2.02

4.76

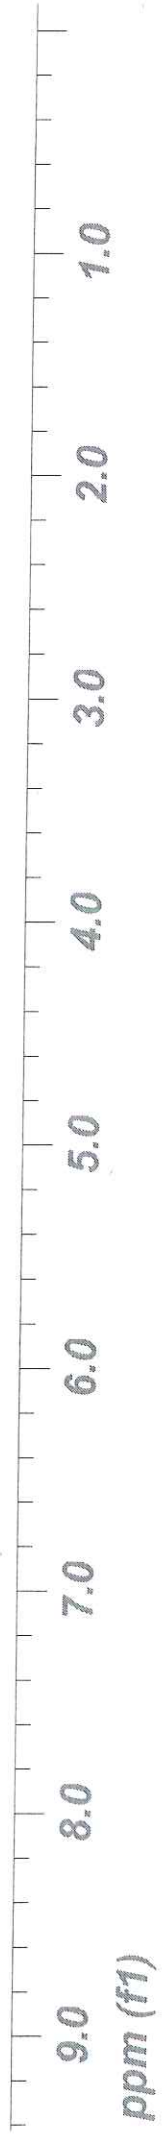

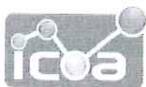

Analysis Info

Sample Name **JCJ.13.029**  
Analysis Name X004948CYC.d  
Method Positif.m

Acquisition Date 29/08/2012 17:50:03

Laboratory  
Instrument / Ser# maXis 255552.00  
086

Acquisition Parameter

|             |            |                       |            |                  |           |
|-------------|------------|-----------------------|------------|------------------|-----------|
| Source Type | ESI        | Ion Polarity          | Positive   | Set Nebulizer    | 0.6 Bar   |
| Focus       | Not active | Set Capillary         | 4500 V     | Set Dry Heater   | 200 °C    |
| Scan Begin  | 50 m/z     | Set End Plate Offset  | -500 V     | Set Dry Gas      | 7.0 l/min |
| Scan End    | 3000 m/z   | Set Collision Cell RF | 1000.0 Vpp | Set Divert Valve | Waste     |

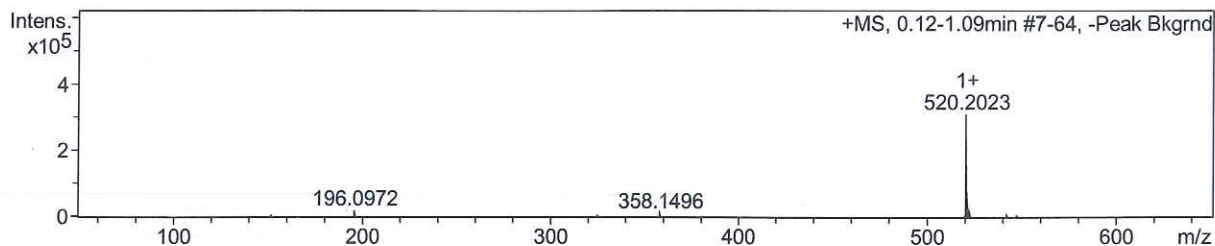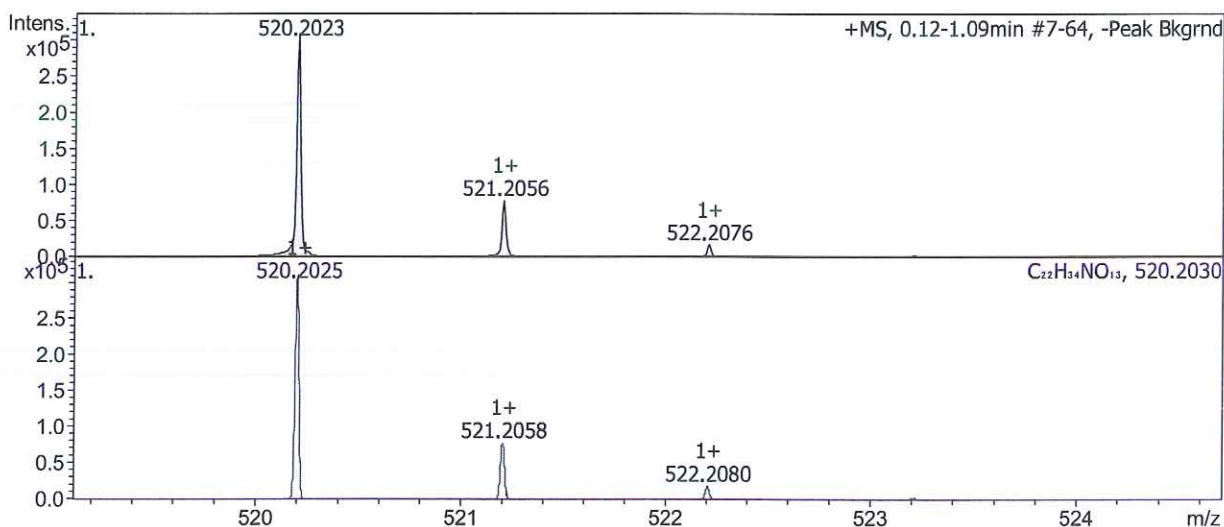

| Meas. m/z  | # | Ion Formula  | m/z        | err [ppm] | mSigma | rdb | e <sup>-</sup> Conf | N-Rule |
|------------|---|--------------|------------|-----------|--------|-----|---------------------|--------|
| 196.097167 | 1 | C10H14NO3    | 196.096820 | -1.8      | 7.7    | 4.5 | even                | ok     |
| 358.149604 | 1 | C16H24NO8    | 358.149643 | 0.1       | 3.3    | 5.5 | even                | ok     |
| 520.202301 | 1 | C22H34NO13   | 520.202467 | 0.3       | 2.5    | 6.5 | even                | ok     |
| 542.183739 | 1 | C22H33NNaO13 | 542.184411 | 1.2       | 28.8   | 6.5 | even                | ok     |



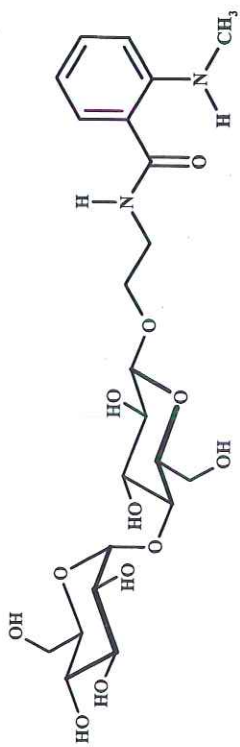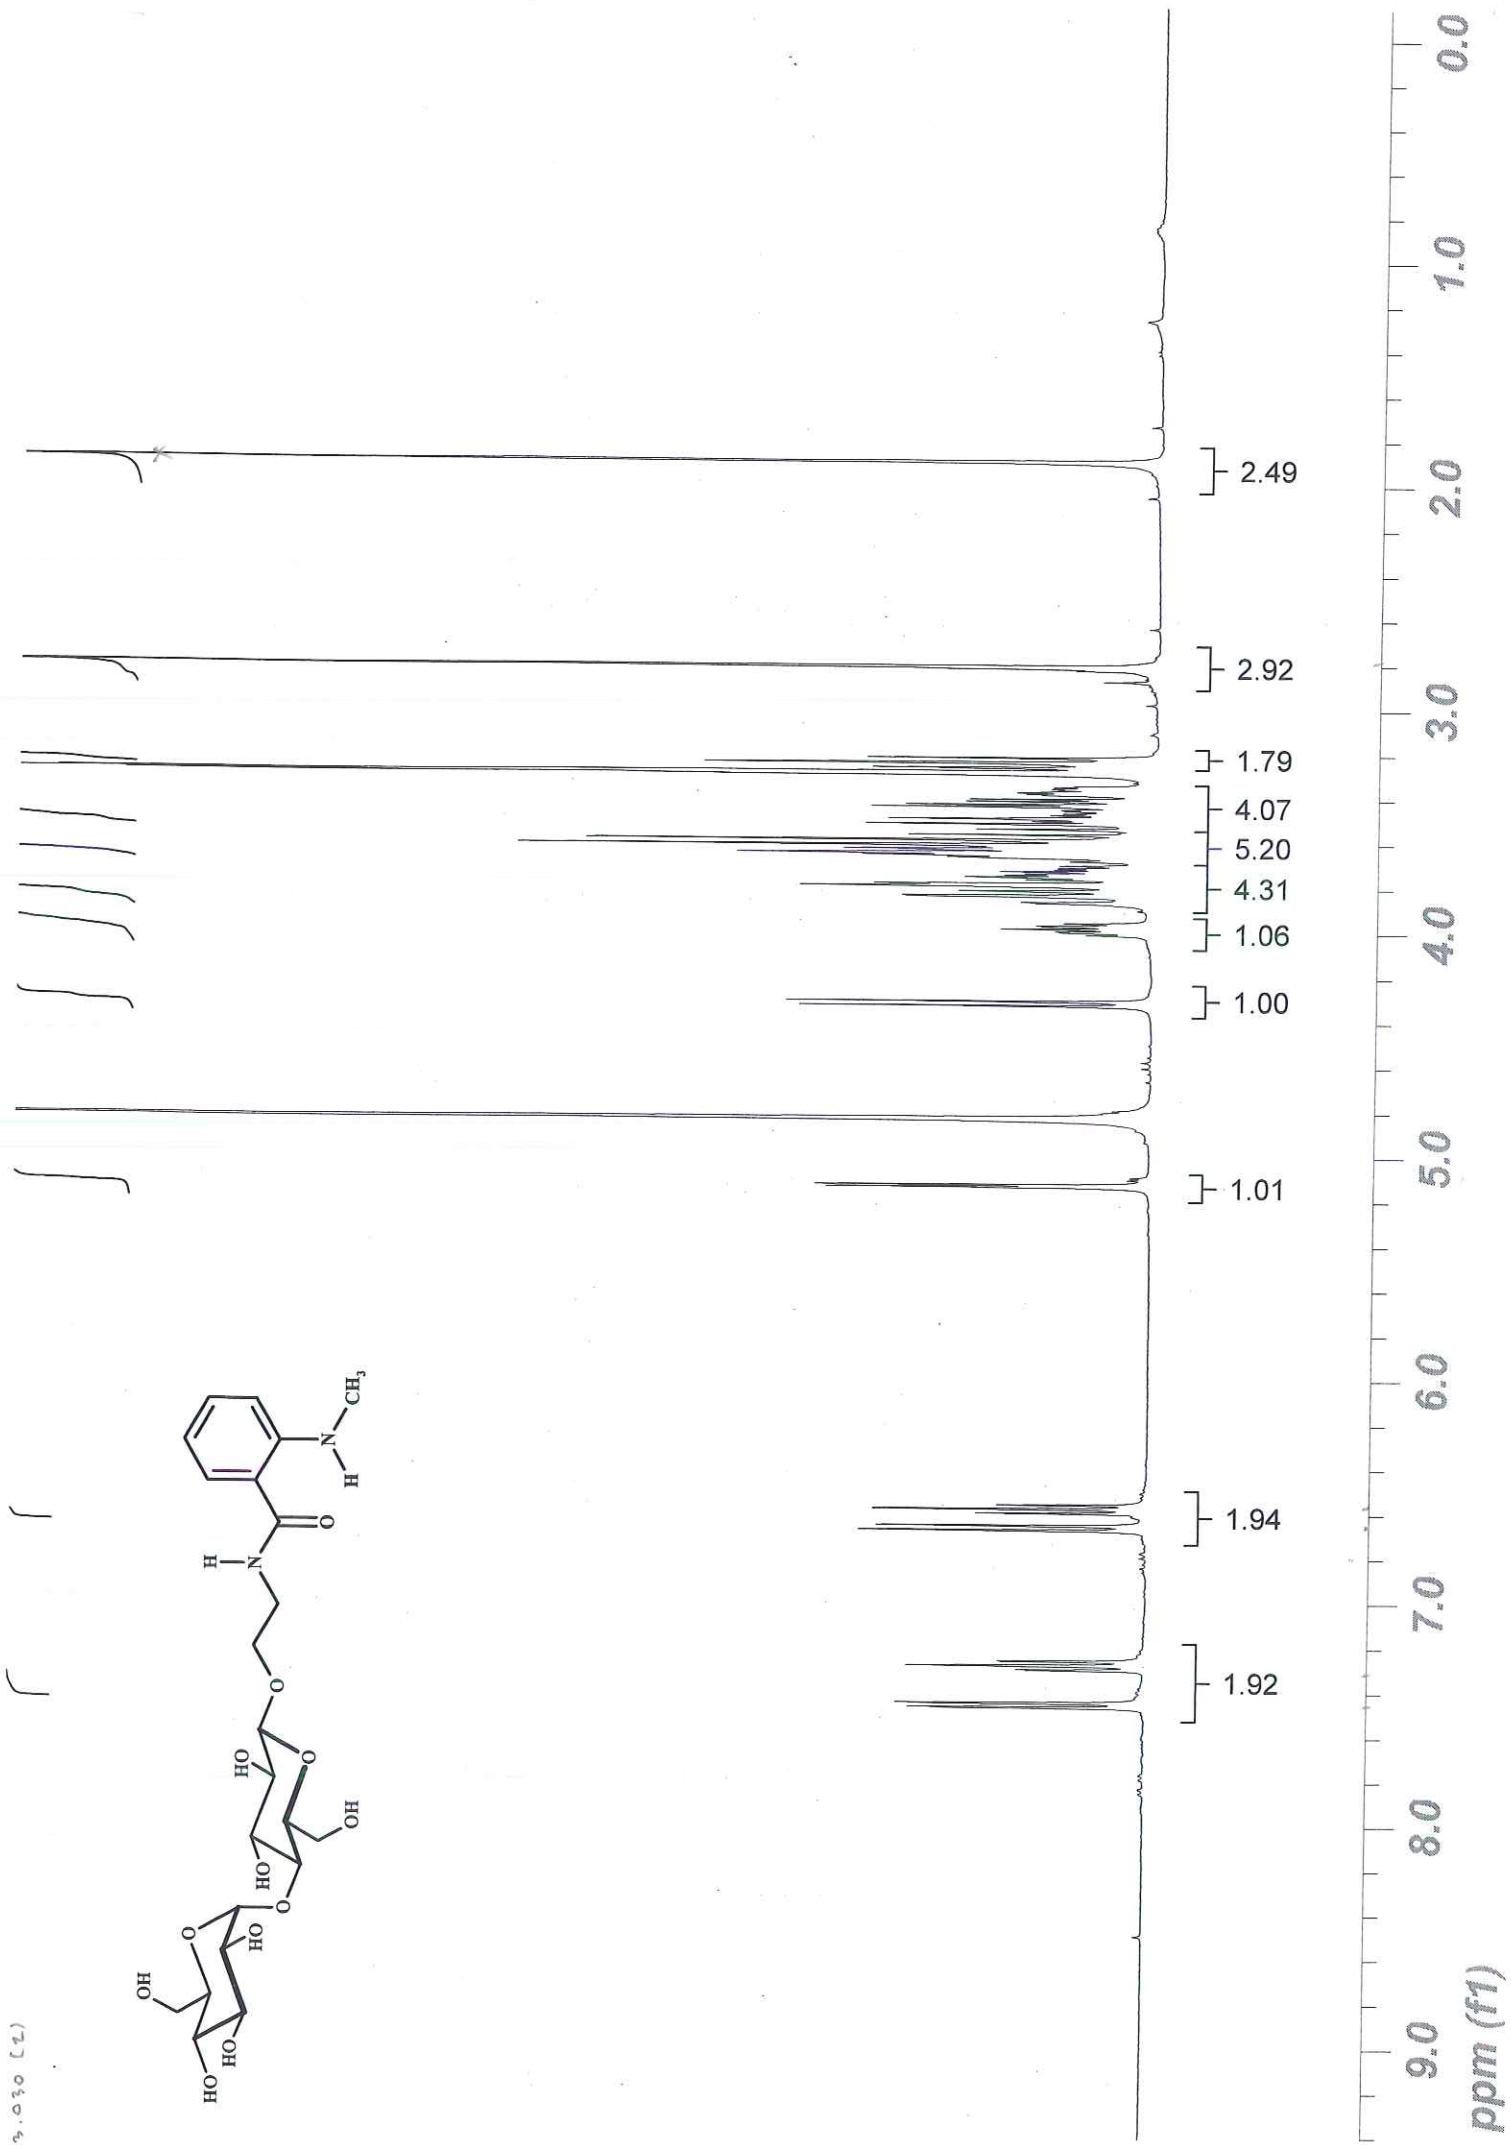

13-030-2

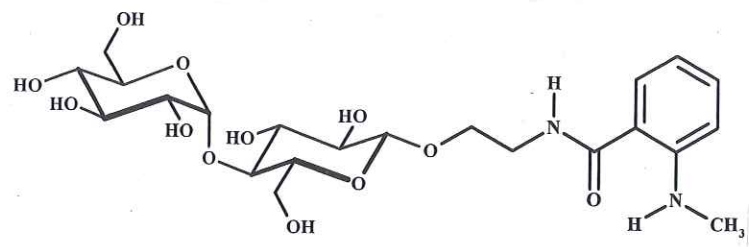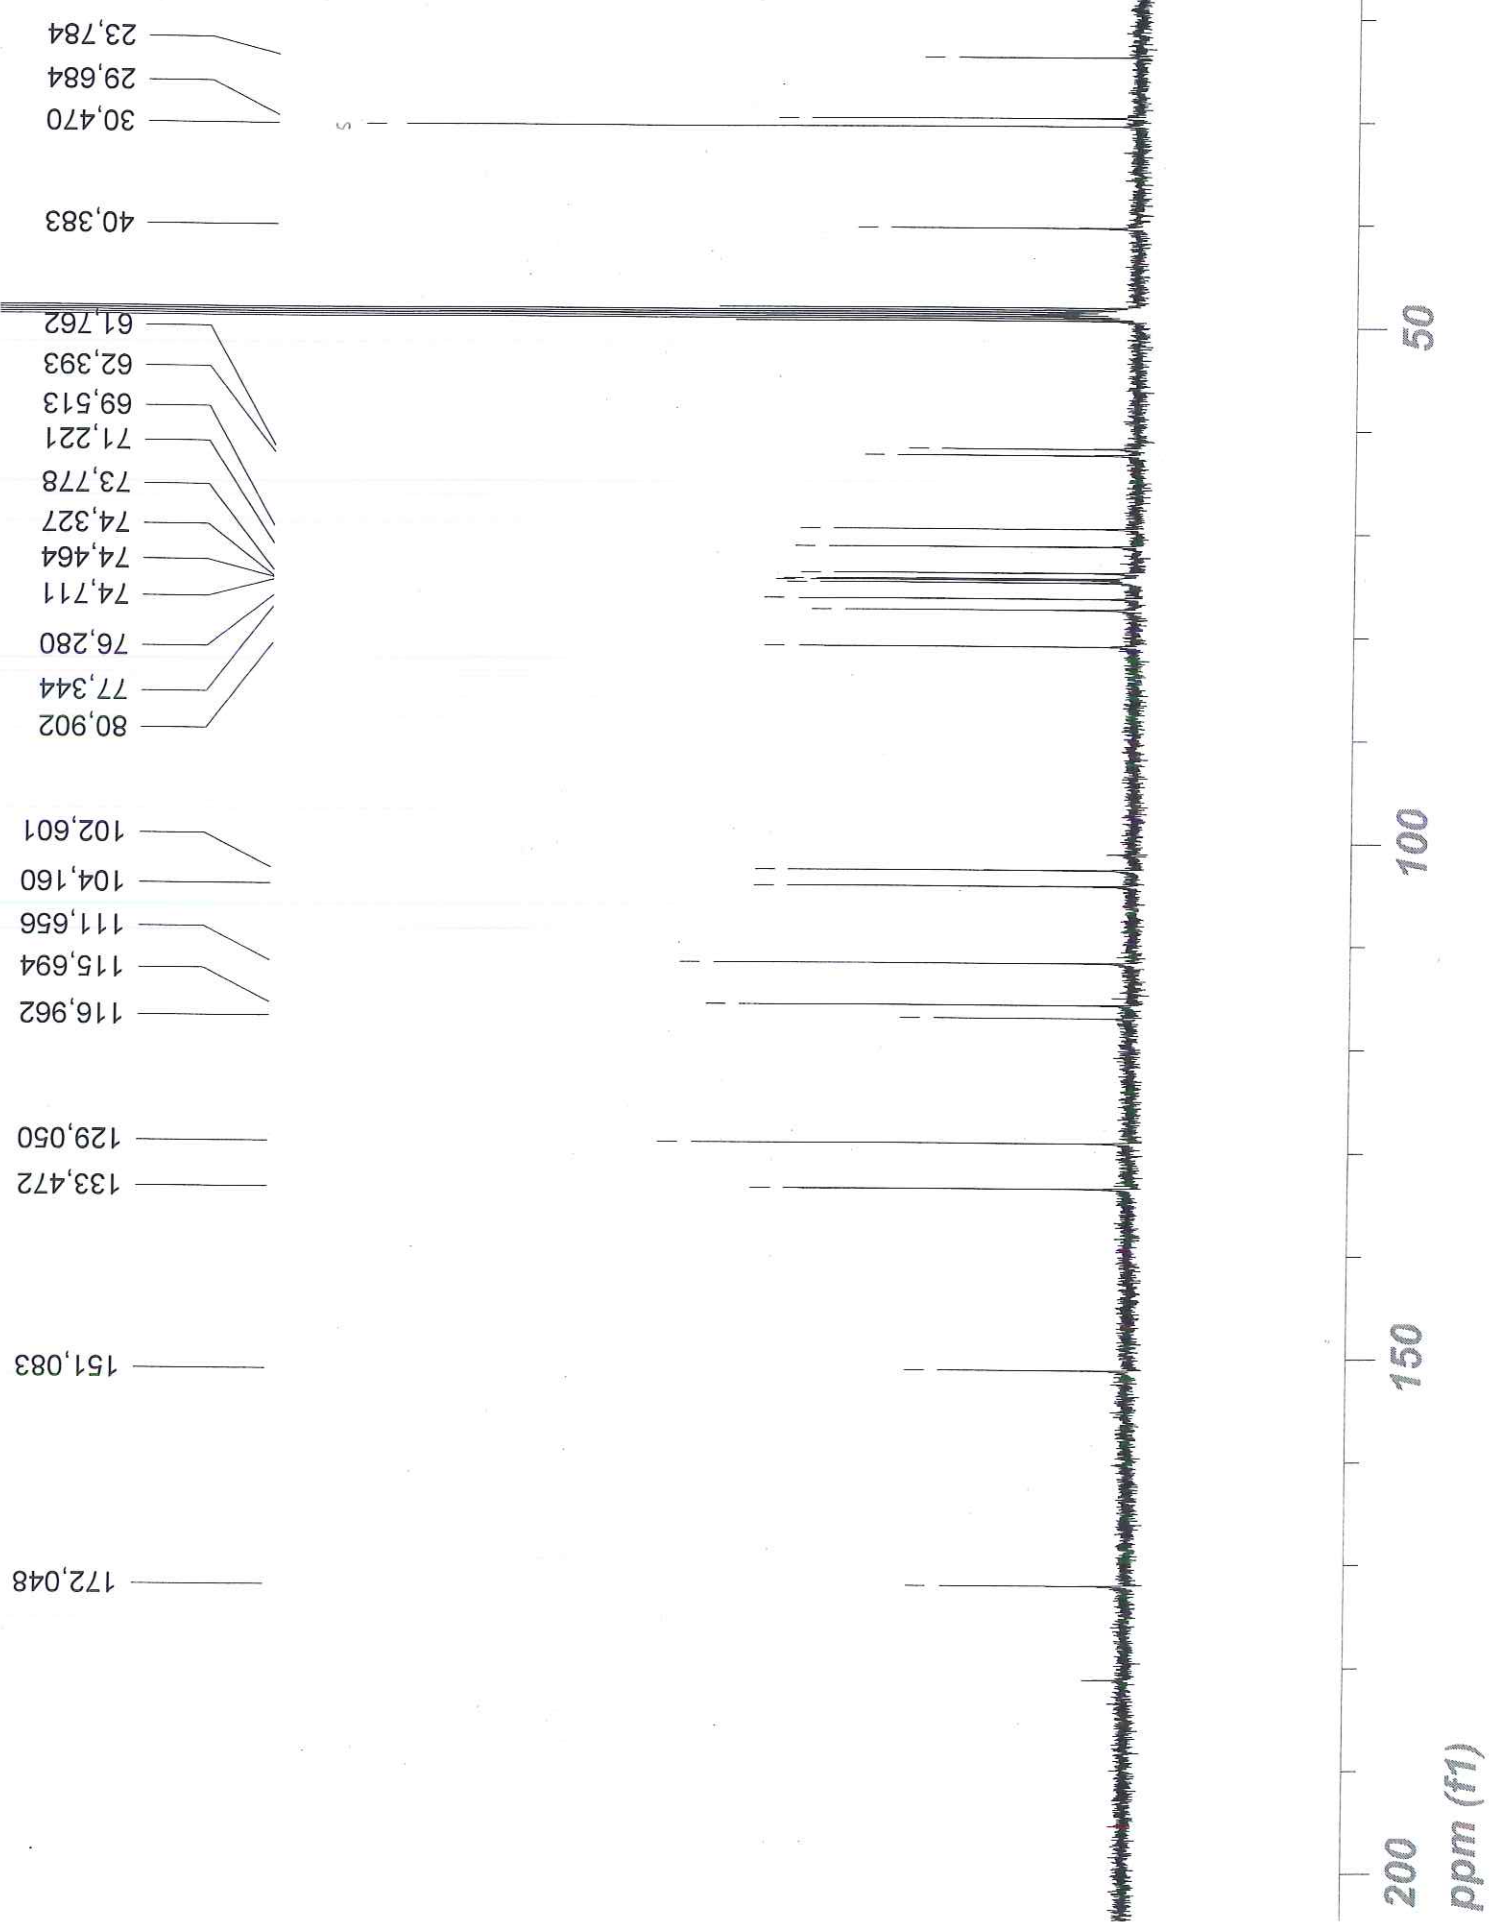

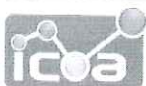

Analysis Info

Sample Name **JCJ.13.030**  
Analysis Name X004949CYC.d  
Method Positif.m

Acquisition Date 29/08/2012 17:52:08

Laboratory  
Instrument / Ser# maXis 255552.00  
086

Acquisition Parameter

|             |            |                       |            |                  |           |
|-------------|------------|-----------------------|------------|------------------|-----------|
| Source Type | ESI        | Ion Polarity          | Positive   | Set Nebulizer    | 0.6 Bar   |
| Focus       | Not active | Set Capillary         | 4500 V     | Set Dry Heater   | 200 °C    |
| Scan Begin  | 50 m/z     | Set End Plate Offset  | -500 V     | Set Dry Gas      | 7.0 l/min |
| Scan End    | 3000 m/z   | Set Collision Cell RF | 1000.0 Vpp | Set Divert Valve | Waste     |

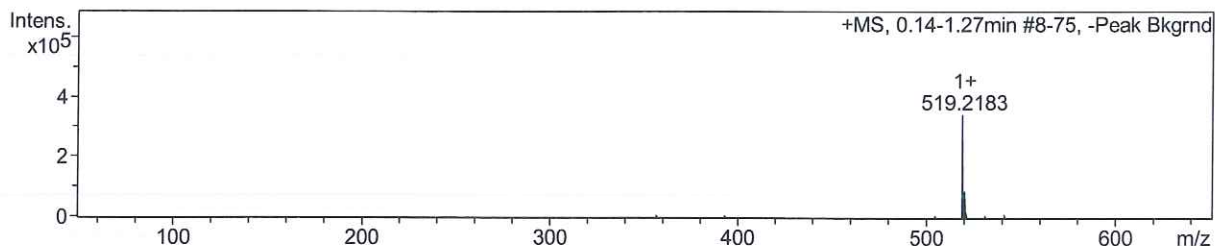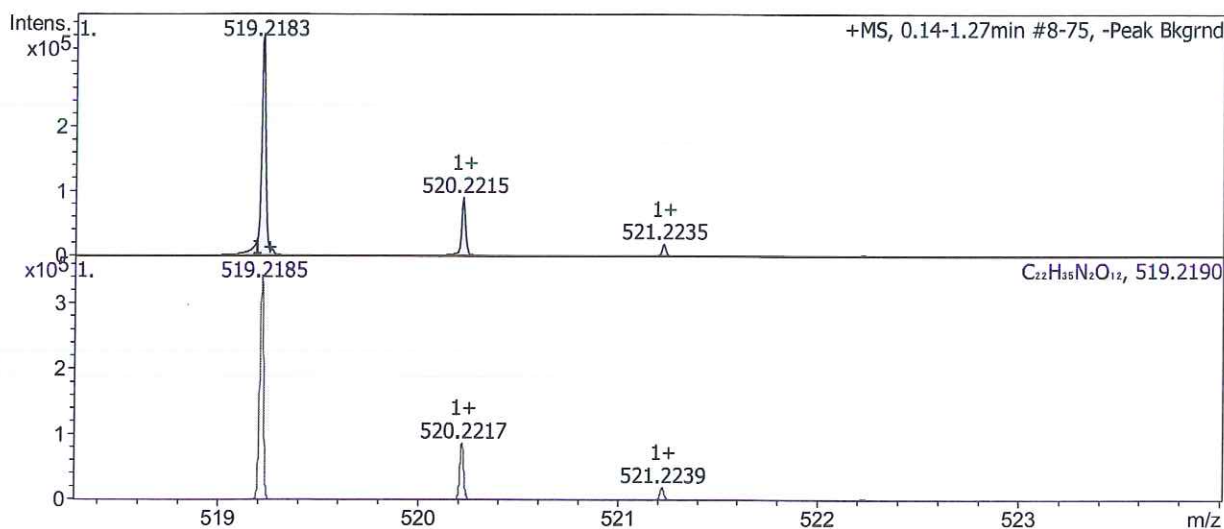

| Meas. m/z  | # | Ion Formula   | m/z        | err [ppm] | mSigma | rdB | e <sup>-</sup> Conf | N-Rule |
|------------|---|---------------|------------|-----------|--------|-----|---------------------|--------|
| 519.218254 | 1 | C22H35N2O12   | 519.218451 | 0.4       | 5.7    | 6.5 | even                | ok     |
| 541.199856 | 1 | C22H34N2NaO12 | 541.200395 | 1.0       | 7.4    | 6.5 | even                | ok     |

12.031 (7600)

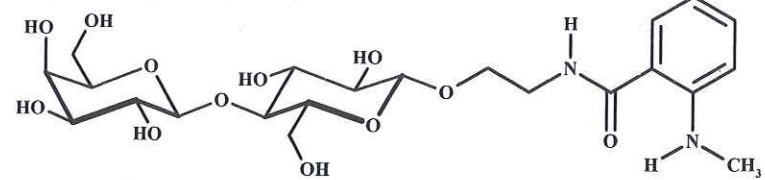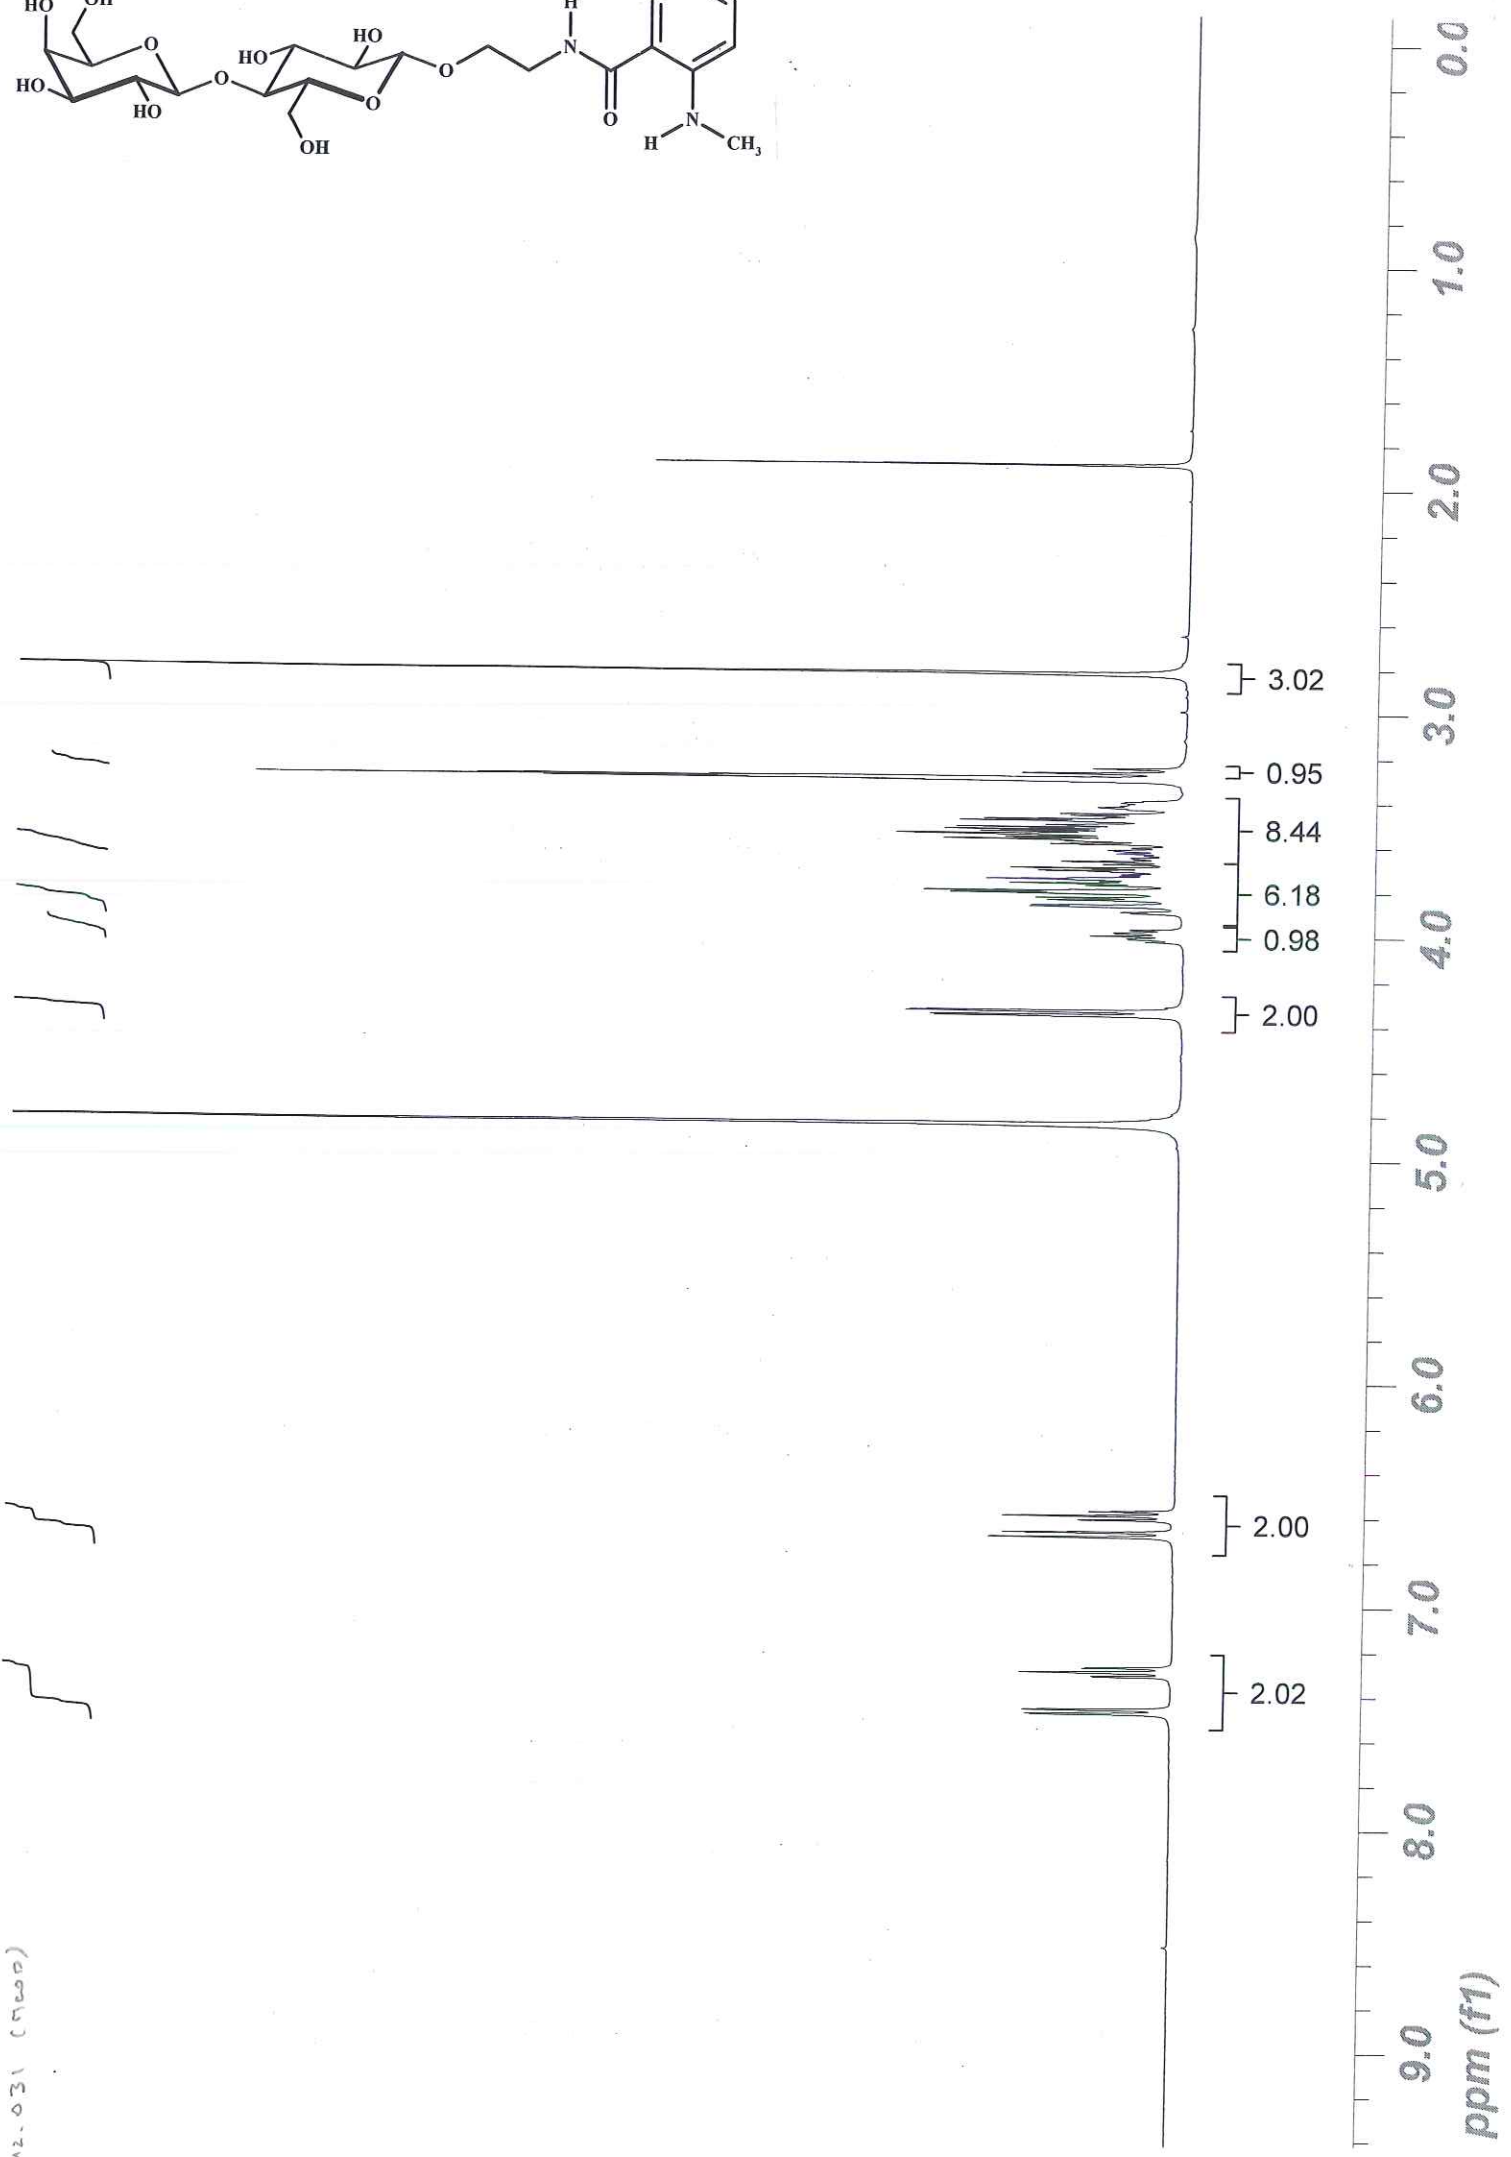

ppm (f1)

200  
150  
100  
50  
0

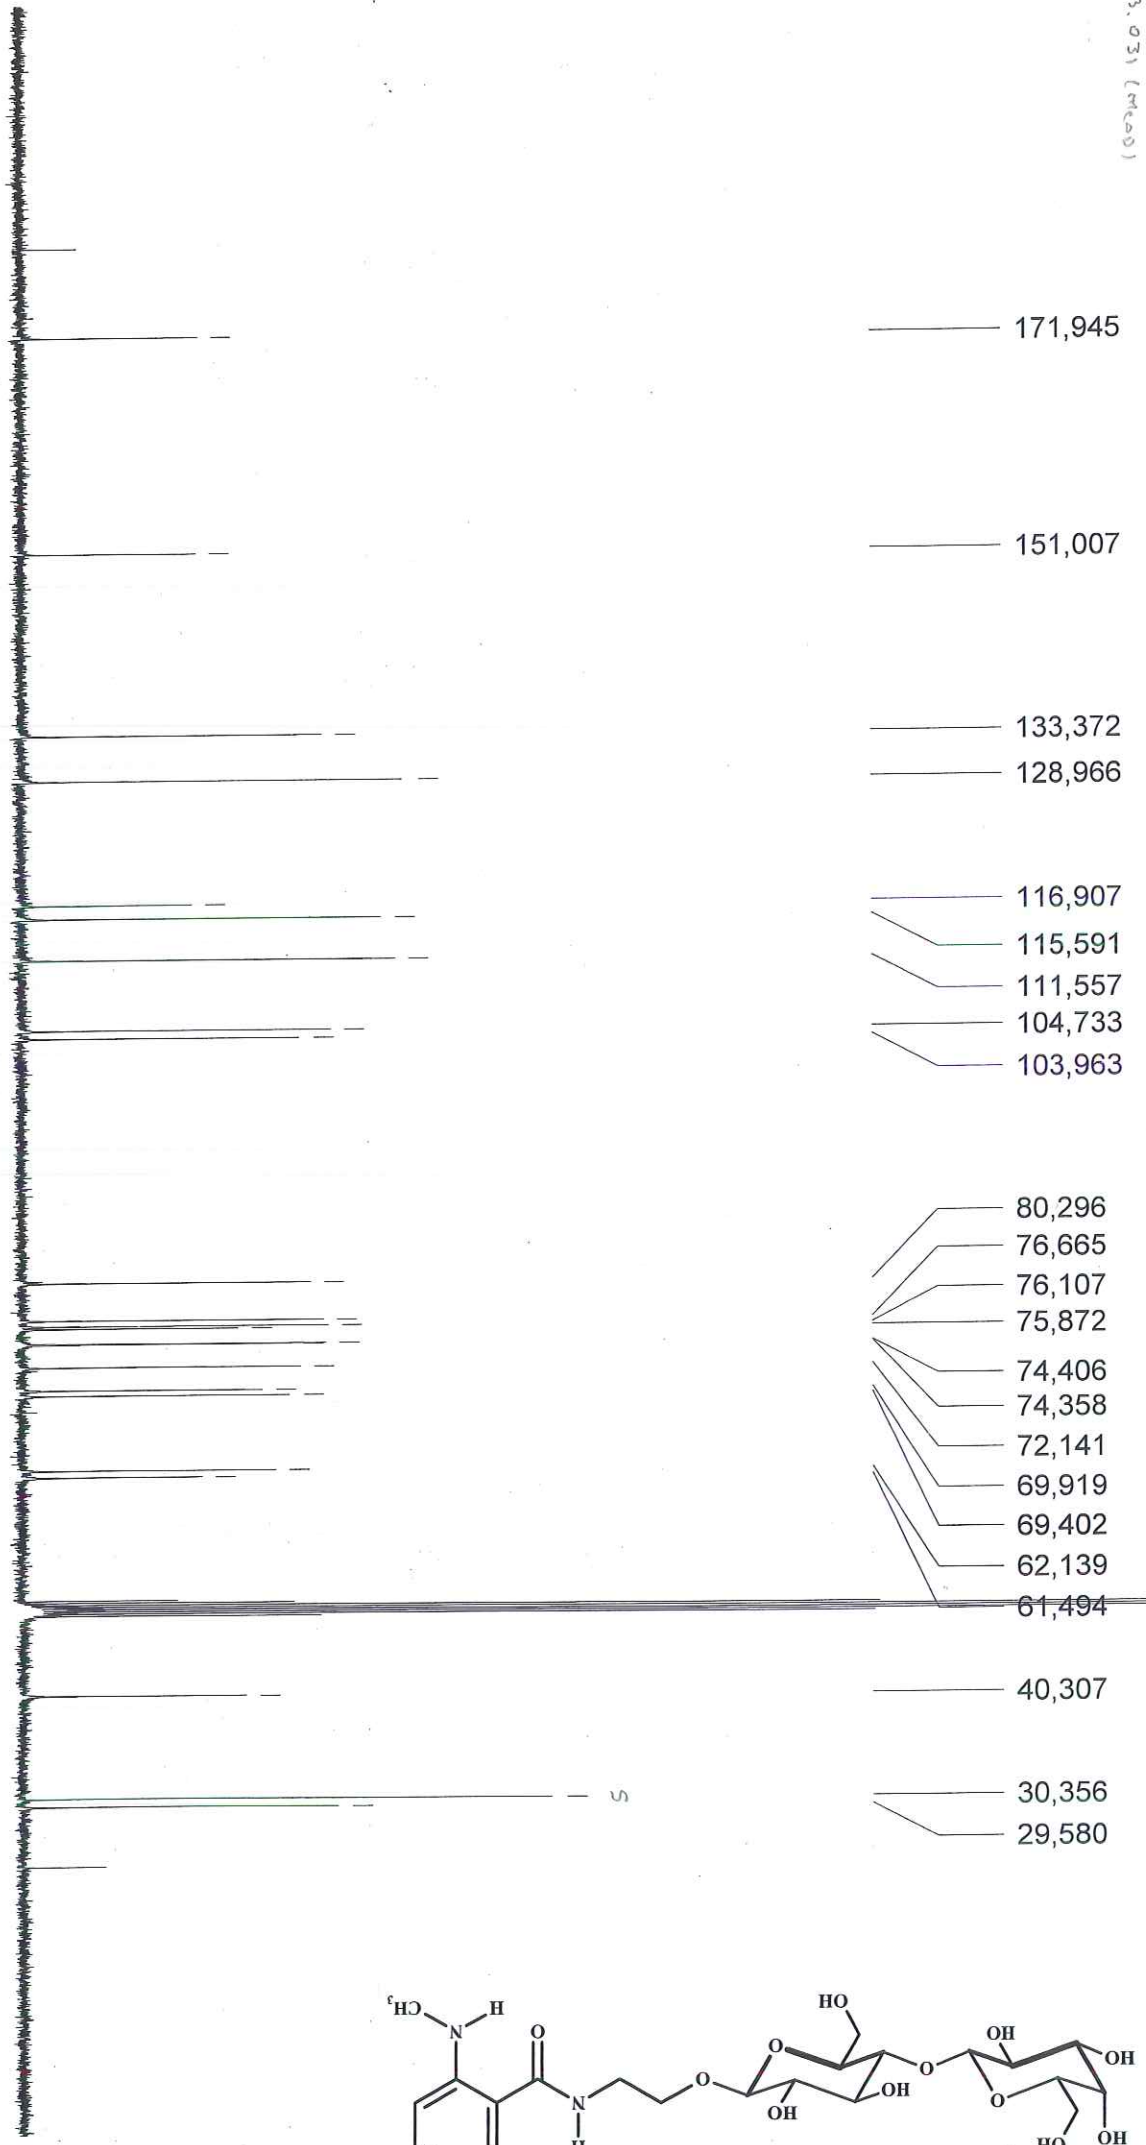



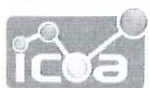

Analysis Info

Sample Name **JCJ.13.031**  
Analysis Name X004950CYC.d  
Method Positif.m

Acquisition Date 29/08/2012 17:54:13

Laboratory  
Instrument / Ser# maXis 255552.00  
086

Acquisition Parameter

|             |            |                       |            |                  |           |
|-------------|------------|-----------------------|------------|------------------|-----------|
| Source Type | ESI        | Ion Polarity          | Positive   | Set Nebulizer    | 0.6 Bar   |
| Focus       | Not active | Set Capillary         | 4500 V     | Set Dry Heater   | 200 °C    |
| Scan Begin  | 50 m/z     | Set End Plate Offset  | -500 V     | Set Dry Gas      | 7.0 l/min |
| Scan End    | 3000 m/z   | Set Collision Cell RF | 1000.0 Vpp | Set Divert Valve | Waste     |

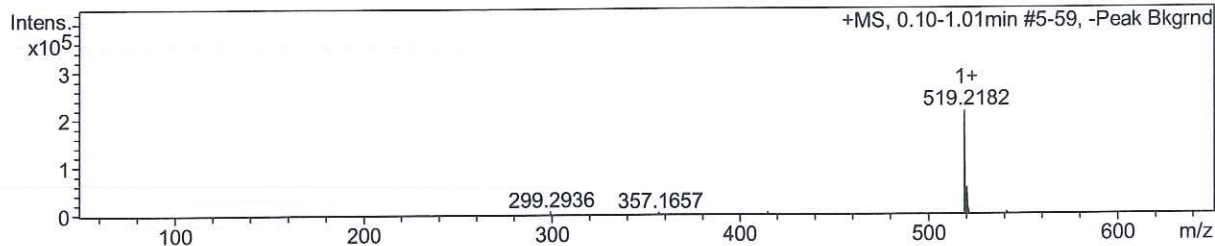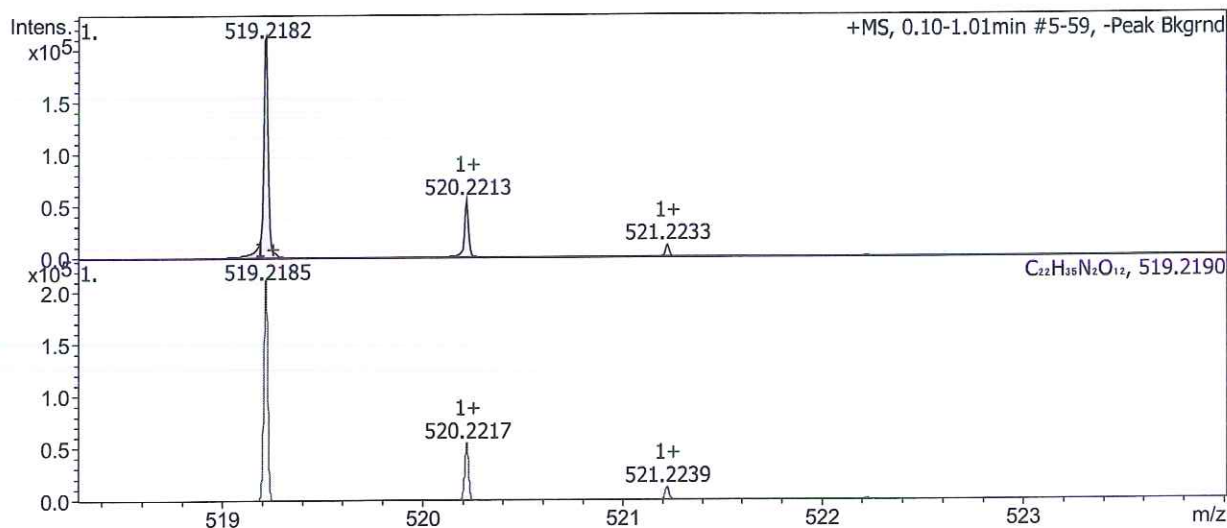

| Meas. m/z  | # | Ion Formula   | m/z        | err [ppm] | mSigma | rdb | e <sup>-</sup> Conf | N-Rule |
|------------|---|---------------|------------|-----------|--------|-----|---------------------|--------|
| 519.218216 | 1 | C22H35N2O12   | 519.218451 | 0.5       | 3.8    | 6.5 | even                | ok     |
| 541.199739 | 1 | C22H34N2NaO12 | 541.200395 | 1.2       | 29.8   | 6.5 | even                | ok     |
